# Supplementary material for: Planar Boronic Graphene and Nitrogenized Graphene Heterostructure for Protein Stretch and Confinement
Source: MDPI journal article supplement (doi:10.3390/biom11121756), 2021-11-24
Supplement: s1 [file s1]

# Supporting Information For

## Planar Boronic Graphene and Nitrogenized Graphene

### Heterostructure for Protein Stretch and Confinement

Xuchang Su<sup>1,2</sup>, Zhi He<sup>2</sup>, Lijun Meng<sup>2</sup>, Hong Liang<sup>1</sup>, and Ruhong Zhou<sup>2,3\*</sup>

<sup>1</sup> Department of Physics, Hangzhou Dianzi University, Hangzhou 310018, China

<sup>2</sup> Institute of Quantitative Biology, College of Life Sciences, Zhejiang University, Hangzhou 310027, China

<sup>3</sup> Department of Chemistry, Columbia University, New York, NY 10027, USA

\* Correspondence should be addressed to [rhzhou@zju.edu.cn](mailto:rhzhou@zju.edu.cn)

#### Context:

Fig. S1 Analysis of end-to-end distances for polyglutamine (polyQ<sub>42</sub>) in solution, on boronic graphene (BC<sub>3</sub>), and the nitrogenized graphene (C<sub>3</sub>N) stripe.

Fig. S2 Analysis of end-to-end distances for  $\alpha$ -Synuclein ( $\alpha$ -Syn<sub>61-95</sub>) in solution, on BC<sub>3</sub>, and the C<sub>3</sub>N stripe.

Fig. S3 Detailed analysis of the polyQ<sub>42</sub> stretching process on the BC<sub>3</sub>/C<sub>3</sub>N/BC<sub>3</sub> heterostructure.

Fig. S4 Detailed analysis of the  $\alpha$ -Syn<sub>61-95</sub> stretching process on the BC<sub>3</sub>/C<sub>3</sub>N/BC<sub>3</sub> heterostructure.

Fig. S5 Influence of the C<sub>3</sub>N stripe width on the potential well for the straightened A $\beta$  peptide.

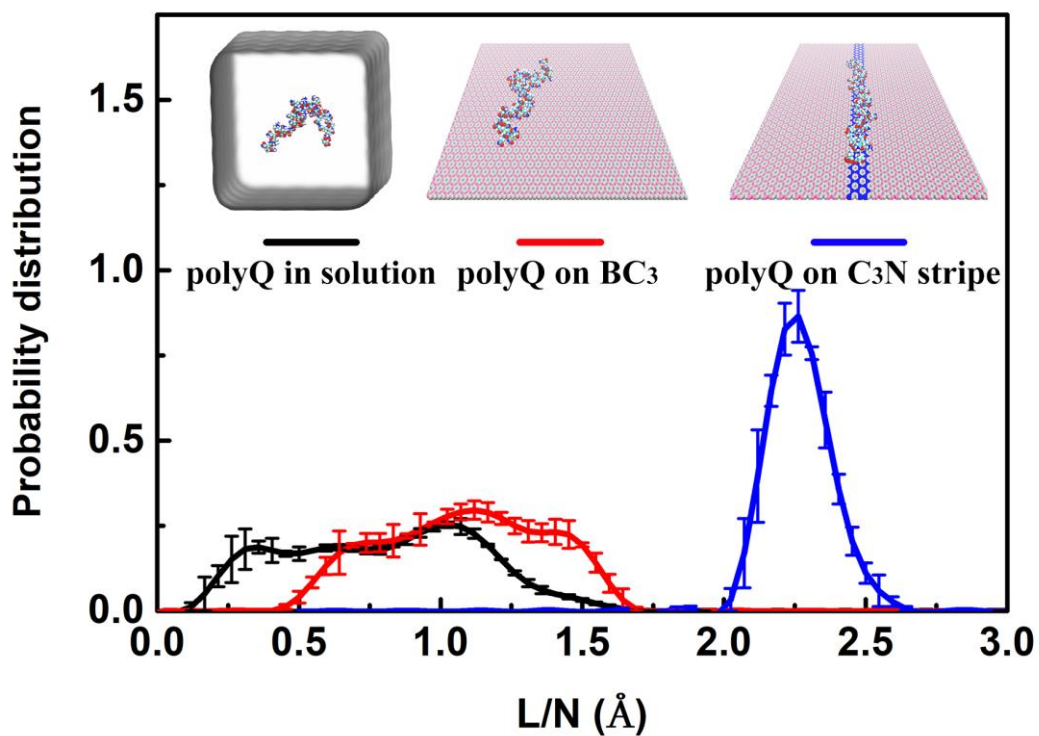

Fig. S1 Probability distribution of end-to-end distances for polyQ in solution (black line), on BC<sub>3</sub> (red line), and the C<sub>3</sub>N stripe (blue line).

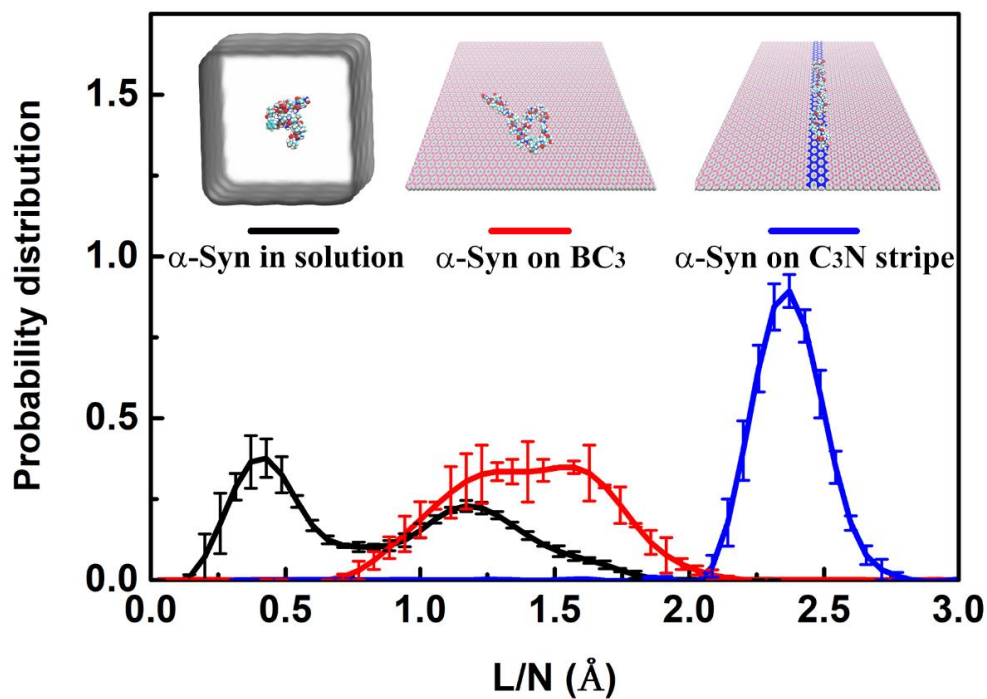

Fig. S2 Probability distribution of end-to-end distances for  $\alpha$ -Syn in solution (black line), on BC<sub>3</sub> (red line), and the C<sub>3</sub>N stripe (blue line).

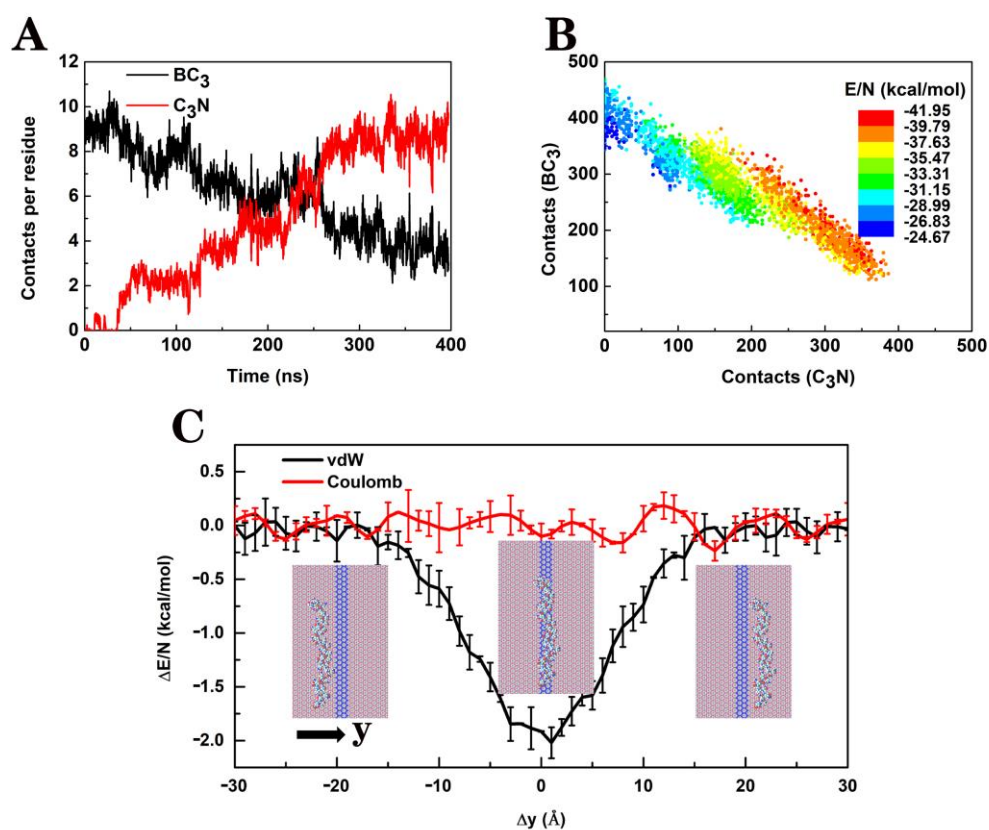

Fig. S3 (A) Number of atoms in BC<sub>3</sub>/C<sub>3</sub>N/BC<sub>3</sub> that are within 4.0 Å of the polyQ peptide throughout the simulation. (B) A scatter plot of the number of atoms in BC<sub>3</sub>/C<sub>3</sub>N/BC<sub>3</sub> in contact with polyQ. The color represents the average interaction energy per residue between polyQ and BC<sub>3</sub>/C<sub>3</sub>N/BC<sub>3</sub>. (C) A smoothed curve of van der Waals (black line) and Coulomb (red line) interaction energy between polyQ and BC<sub>3</sub>/C<sub>3</sub>N/BC<sub>3</sub>, when the elongated polyQ peptide moved across the C<sub>3</sub>N stripe in the y-direction.

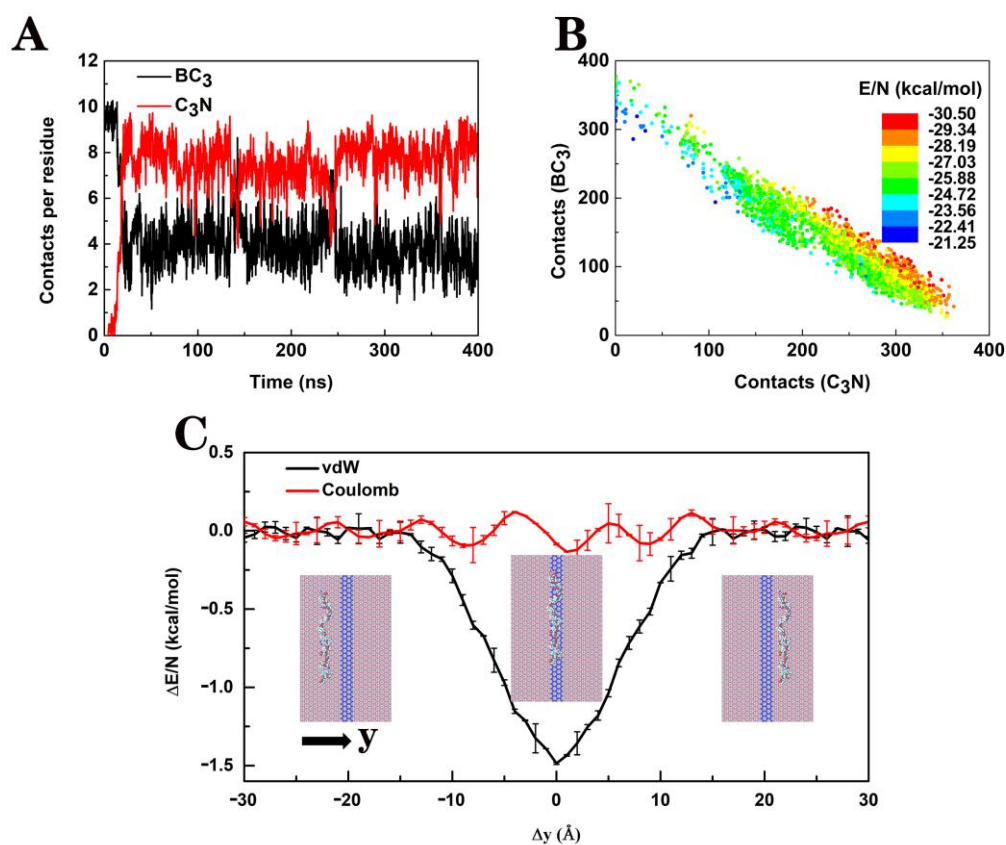

Fig. S4 (A) Number of atoms in BC<sub>3</sub>/C<sub>3</sub>N/BC<sub>3</sub> that are within 4.0 Å of the  $\alpha$ -Syn peptide throughout the simulation. (B) A scatter plot of the number of atoms in BC<sub>3</sub>/C<sub>3</sub>N/BC<sub>3</sub> in contact with  $\alpha$ -Syn. The color represents the average interaction energy per residue between  $\alpha$ -Syn and BC<sub>3</sub>/C<sub>3</sub>N/BC<sub>3</sub>. (C) A smoothed curve of van der Waals (black line) and Coulomb (red line) interaction energy between  $\alpha$ -Syn and BC<sub>3</sub>/C<sub>3</sub>N/BC<sub>3</sub>, when the elongated  $\alpha$ -Syn peptide moved across the C<sub>3</sub>N stripe in the y-direction.

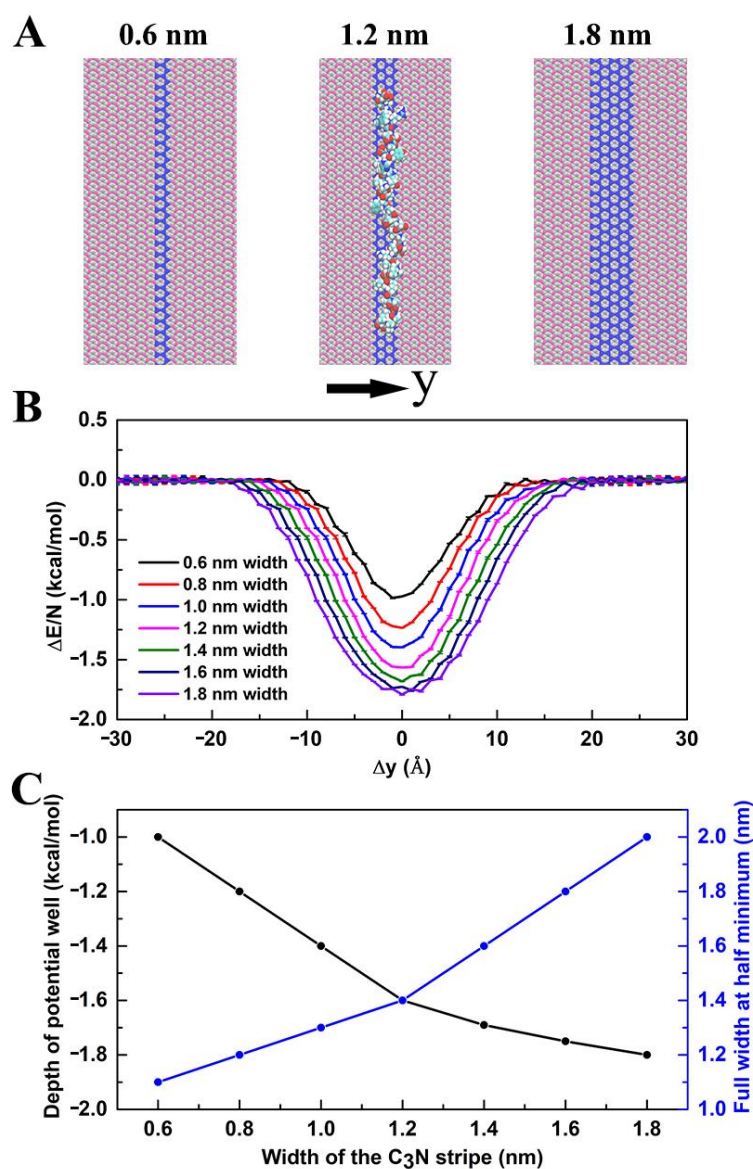

Fig. S5 Influence of the C<sub>3</sub>N stripe width on the potential well for the straightened A $\beta$  peptide. (A) Representative illustrations of C<sub>3</sub>N stripes with widths of 0.6 nm, 1.2 nm, and 1.8 nm, respectively. The A $\beta$  peptide elongated on the 1.2-nm-width C<sub>3</sub>N stripe was used for the energy scan of each potential well. (B) Smoothed curves of van der Waals interaction energies between A $\beta$  and BC<sub>3</sub>/C<sub>3</sub>N/BC<sub>3</sub>, when the elongated A $\beta$  peptide moved across each C<sub>3</sub>N stripe with different widths in the y-direction. (C) The “potential-depth” (black line) and the “potential-width” at half-minimum of each well as a function of the C<sub>3</sub>N stripe width.
